# Supplementary material
Source: Springer Nature journal article supplement (https://www.springermedizin.de/resource/supplementary/12879_2011_1578_MOESM6_ESM.pdf/9442854)

**(a)**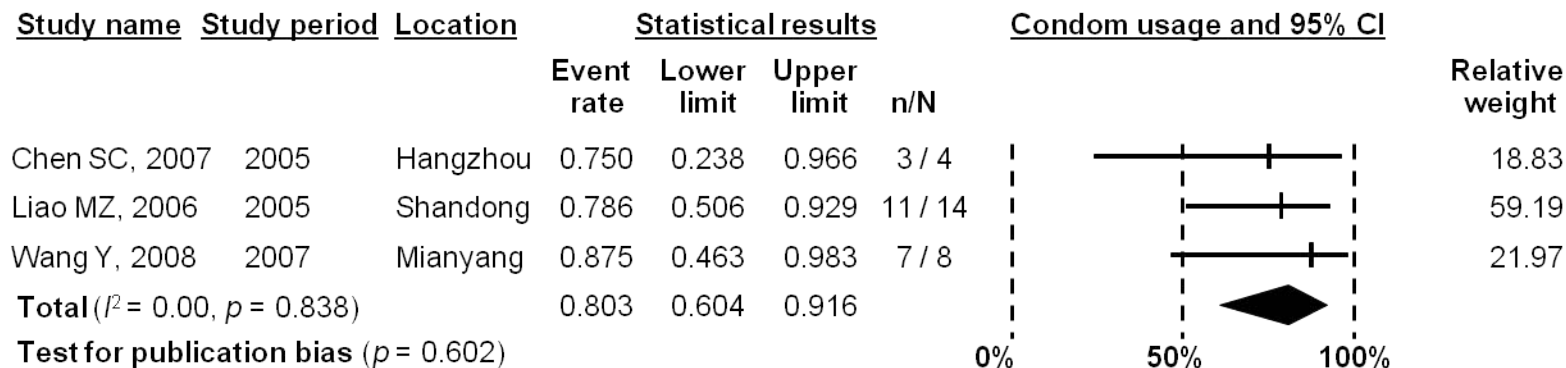**(b)**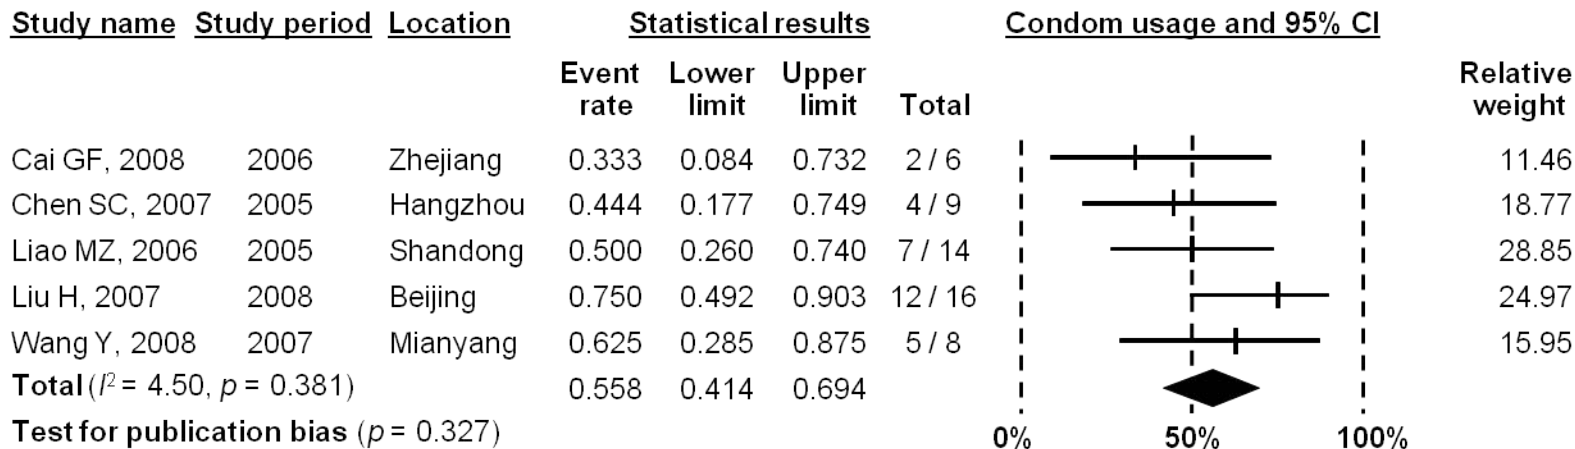

Supplement: MOESM6 [file 9442854]
